# Supplementary material
Source: Springer Nature journal article supplement (https://www.springermedizin.de/resource/supplementary/13058_2013_3369_MOESM13_ESM.pdf/9703970)

**A**

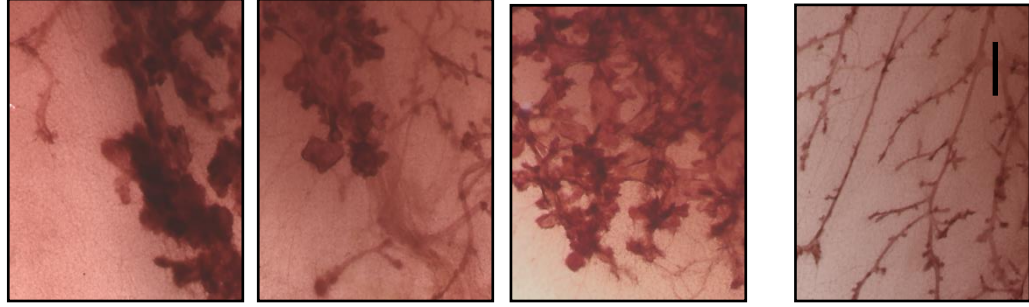

**B**

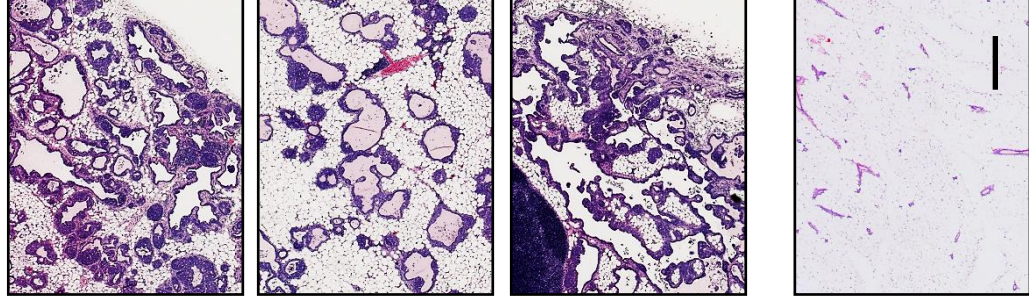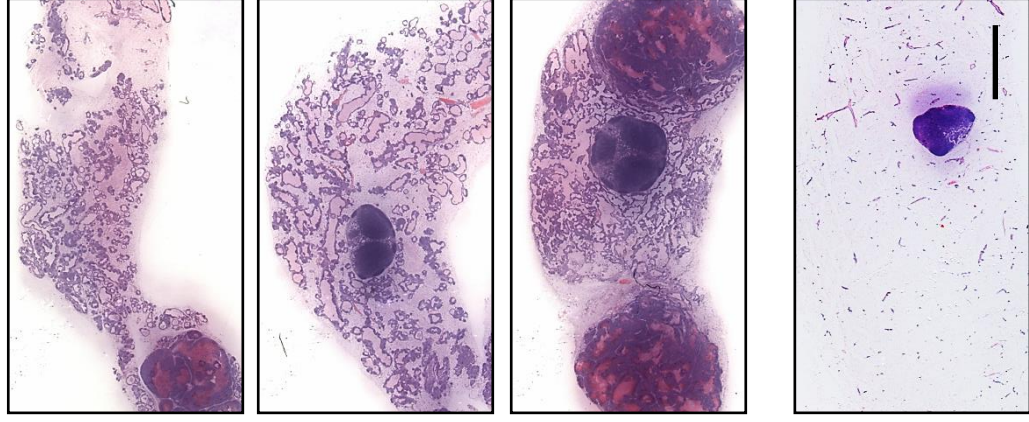

rTA/MIC (+Dox)

rTA/MIC (-Dox)

Supplement: MOESM13 [file 9703970]
